# Supplementary material for: Automated Identification of Core Regulatory Genes in Human Gene Regulatory Networks
Source: PLoS Comput Biol. 2015 Sep 22;11(9):e1004504. doi: 10.1371/journal.pcbi.1004504 (PMC4578944; doi:10.1371/journal.pcbi.1004504)
Supplement: S1 Text — Provides additional analyses on (1) Four different MCF-7 E2 vs. Control public datasets used to build the MCF-7 ER network, (2) Literature support for regulatory nodes in the MCF-7 ER network, (3) Comparison of MCF-7 ER network with random networks. (DOCX) [file pcbi.1004504.s001.docx]

# This file contains additional figures and tables to supplement the article Narang V et al., “Automated Identification of Core Regulatory Genes in Human Gene Networks”, 2015

**(1) Four different MCF-7 E2 vs. Control public datasets used to build the MCF-7 ER network**

| 12hrs | 24hrs | No. of genes |
| --- | --- | --- |
| Up | Up | 806 |
| Up | Down | 0 |
| Down | Up | 0 |
| Down | Down | 567 |


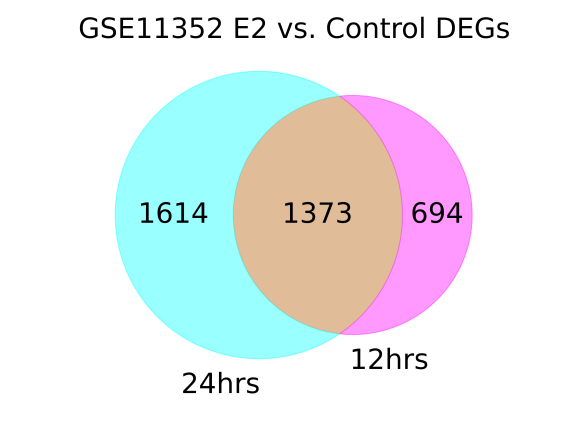


(a) (b)

Supplementary Figure : (a) Overlap between lists of differentially expressed genes (FDR < 0.05) at 12hr and 24hr time points in GSE11352 dataset, (b) Directions of fold changes of 1373 common genes at 12hrs and 24hrs.


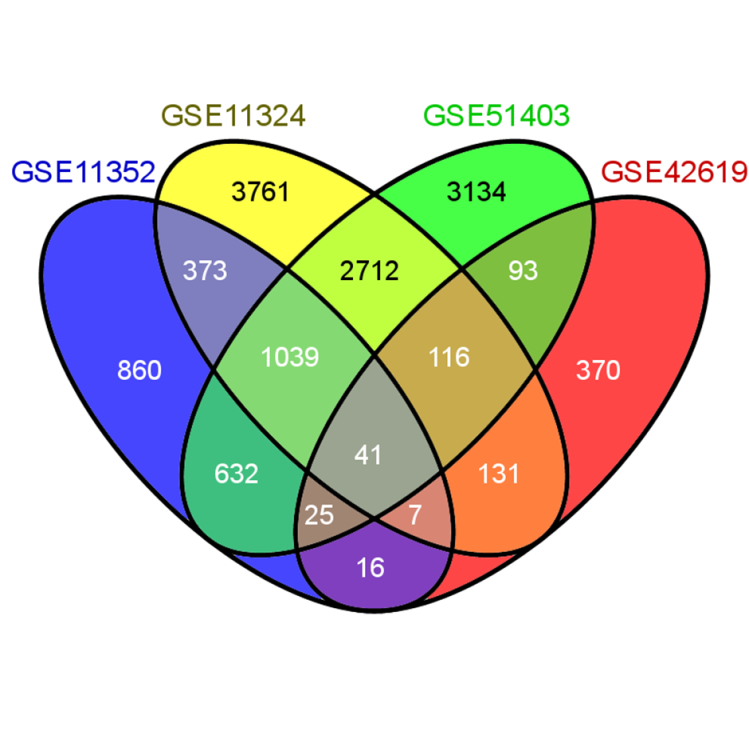


Supplementary Figure . Overlap of differentially expressed genes with FDR < 0.05 in various MCF-7 E2 vs. Control datasets.

**(2) Literature support for regulatory nodes in the MCF-7 ER network**

Supplementary Table 1. Google Scholar was used to perform a query using the format ‘+“MCF-7” +estrogen +regulator’ where regulator is the gene symbol. The number of results (publications) returned by Google Scholar is shown here as a quantitative measure of the relevance of a regulator to the MCF-7 ER network. For some regulators whose official gene symbol is not as popular as an alternative name, the alternative name was used to perform the query.

| **Molecule** | **Rank** | **Original Search** | **Alternate Name** | **Alternate Search** | **Final Count** |
| --- | --- | --- | --- | --- | --- |
| ESR1 | 1 | 2270 | Estrogen Receptor | 84700 | 84700 |
| TP53 | 2 | 3670 | p53 | 26600 | 26600 |
| JUN | 3 | 21300 |  |  | 21300 |
| PGR | 4 | 3870 | Progesterone receptor | 19900 | 19900 |
| MYC | 5 | 16100 |  |  | 16100 |
| AR | 6 | NA | Androgen Receptor | 11000 | 11000 |
| FOS | 7 | 9180 |  |  | 9180 |
| BRCA1 | 8 | 7780 |  |  | 7780 |
| STAT3 | 9 | 4750 | STAT | 6460 | 6460 |
| STAT2 | 10 | 240 | STAT | 6460 | 6460 |
| E2F1 | 11 | 2410 | E2F | 4260 | 4260 |
| E2F6 | 12 | 110 | E2F | 4260 | 4260 |
| E2F3 | 13 | 328 | E2F | 4260 | 4260 |
| SMAD3 | 14 | 1320 | SMAD | 2690 | 2690 |
| FOXA1 | 15 | 986 | Forkhead | 2690 | 2690 |
| ARNT | 16 | 1900 |  |  | 1900 |
| GATA3 | 17 | 944 | GATA | 1820 | 1820 |
| GATA2 | 18 | 130 | GATA | 1820 | 1820 |
| MYB | 19 | 1590 |  |  | 1590 |
| CXCL12 | 20 | 1330 |  |  | 1330 |
| SP3 | 21 | 1260 |  |  | 1260 |
| ELF1 | 22 | 44 | Elongation Factor | 1190 | 1190 |
| TFAP2C | 23 | 126 | AP-2 | 1140 | 1140 |
| HDAC2 | 24 | 1080 |  |  | 1080 |
| TP63 | 25 | 82 | p63 | 1070 | 1070 |
| EZH2 | 26 | 991 |  |  | 991 |
| CDKN1A | 27 | 942 |  |  | 942 |
| JUNB | 28 | 746 | AP-1 | 9470 | 746 |
| HIF1A | 29 | 298 | HIF1 | 684 | 684 |
| REL | 30 | 680 |  |  | 680 |
| SRF | 31 | 574 | Serum response | 1030 | 574 |
| SMAD7 | 32 | 573 |  |  | 573 |
| EGR1 | 33 | 571 |  |  | 571 |
| PARP1 | 34 | 560 |  |  | 560 |
| ATF2 | 35 | 544 |  |  | 544 |
| SOX3 | 36 | 55 | SOX | 522 | 522 |
| NCOA3 | 37 | 511 |  |  | 511 |
| USF1 | 38 | 135 | USF | 432 | 432 |
| USF2 | 39 | 94 | USF | 432 | 432 |
| ATF3 | 40 | 418 |  |  | 418 |
| SOX9 | 41 | 399 |  |  | 399 |
| HMGB1 | 42 | 382 |  |  | 382 |
| ATF4 | 43 | 373 |  |  | 373 |
| ETS2 | 44 | 360 |  |  | 360 |
| RXRA | 45 | 331 |  |  | 331 |
| NME2 | 46 | 295 |  |  | 295 |
| HES1 | 47 | 295 |  |  | 295 |
| YBX1 | 48 | 40 | YB-1 | 292 | 292 |
| E2F2 | 49 | 279 |  |  | 279 |
| PPARA | 50 | 278 |  |  | 278 |
| RUNX3 | 51 | 241 |  |  | 241 |
| GATA4 | 52 | 232 |  |  | 232 |
| MEF2C | 53 | 183 |  |  | 183 |
| CREB1 | 54 | 180 |  |  | 180 |
| IRF1 | 55 | 172 |  |  | 172 |
| FOXC2 | 56 | 169 |  |  | 169 |
| EGR3 | 57 | 157 |  |  | 157 |
| TCF7L2 | 58 | 136 |  |  | 136 |
| MAFF | 59 | 132 |  |  | 132 |
| TAF1 | 60 | 126 |  |  | 126 |
| HBP1 | 61 | 123 |  |  | 123 |
| CEBPA | 62 | 120 |  |  | 120 |
| E4F1 | 63 | 114 |  |  | 114 |
| RAD21 | 64 | 104 |  |  | 104 |
| HSF2 | 65 | 95 |  |  | 95 |
| GABPA | 66 | 93 |  |  | 93 |
| RXRB | 67 | 84 |  |  | 84 |
| SREBF1 | 68 | 82 |  |  | 82 |
| MAFG | 69 | 82 |  |  | 82 |
| NR1H3 | 70 | 81 |  |  | 81 |
| ESRRA | 71 | 81 |  |  | 81 |
| MAFK | 72 | 75 |  |  | 75 |
| LMO2 | 73 | 72 |  |  | 72 |
| HEY2 | 74 | 69 |  |  | 69 |
| HSA-MIR-489 | 75 | 62 |  |  | 62 |
| MYBL1 | 76 | 62 |  |  | 62 |
| KLF10 | 77 | 59 |  |  | 59 |
| ILF3 | 78 | 56 |  |  | 56 |
| NFAT5 | 79 | 56 |  |  | 56 |
| SMC3 | 80 | 56 |  |  | 56 |
| ASCL1 | 81 | 46 |  |  | 46 |
| IRF2 | 82 | 44 |  |  | 44 |
| ELK4 | 83 | 43 |  |  | 43 |
| SIM1 | 84 | 42 |  |  | 42 |
| NFYA | 85 | 42 |  |  | 42 |
| MEIS2 | 86 | 38 |  |  | 38 |
| BCLAF1 | 87 | 37 |  |  | 37 |
| KLF11 | 88 | 36 |  |  | 36 |
| RFX5 | 89 | 31 |  |  | 31 |
| ZBTB4 | 90 | 30 |  |  | 30 |
| GRHL3 | 91 | 28 |  |  | 28 |
| SMARCC1 | 92 | 26 |  |  | 26 |
| CHD2 | 93 | 25 |  |  | 25 |
| PBX3 | 94 | 23 |  |  | 23 |
| HNRNPD | 95 | 20 |  |  | 20 |
| BHLHE40 | 96 | 20 |  |  | 20 |
| BATF | 97 | 20 |  |  | 20 |
| ZNF143 | 98 | 18 |  |  | 18 |
| THAP1 | 99 | 17 |  |  | 17 |
| TCERG1 | 100 | 16 |  |  | 16 |
| AFF4 | 101 | 15 |  |  | 15 |
| HSA-MIR-17-5P | 102 | 14 |  |  | 14 |
| FOXE3 | 103 | 12 |  |  | 12 |
| ZBTB33 | 104 | 11 |  |  | 11 |
| GABPB1 | 105 | 10 |  |  | 10 |
| MXD4 | 106 | 10 |  |  | 10 |
| PURB | 107 | 9 |  |  | 9 |
| FOXN2 | 108 | 8 |  |  | 8 |
| HSA-MIR-548M | 109 | 8 |  |  | 8 |
| HSA-MIR-1231 | 110 | 7 |  |  | 7 |
| CREB3L1 | 111 | 6 |  |  | 6 |
| HSA-MIR-653 | 112 | 6 |  |  | 6 |
| ZNF367 | 113 | 6 |  |  | 6 |
| GTF2F1 | 114 | 6 |  |  | 6 |
| CEBPZ | 115 | 5 |  |  | 5 |
| HSA-MIR-20A-5P | 116 | 5 |  |  | 5 |
| HSA-MIR-93-5P | 117 | 5 |  |  | 5 |
| HSA-MIR-942 | 118 | 5 |  |  | 5 |
| HSA-MIR-22-3P | 119 | 5 |  |  | 5 |
| HSA-MIR-941 | 120 | 4 |  |  | 4 |
| HSA-MIR-636 | 121 | 4 |  |  | 4 |
| HSA-MIR-25-3P | 122 | 4 |  |  | 4 |
| HSA-MIR-92A-3P | 123 | 4 |  |  | 4 |
| HSA-MIR-623 | 124 | 3 |  |  | 3 |
| NAA15 | 125 | 2 |  |  | 2 |
| HSA-MIR-548F | 126 | 2 |  |  | 2 |
| HSA-MIR-4800-5P | 127 | 0 | mir-4800 | 2 | 2 |
| WRNIP1 | 128 | 1 |  |  | 1 |
| HSA-MIR-106B-5P | 129 | 1 |  |  | 1 |
| TMEM229A | 130 | 0 |  |  | 0 |
| HSA-MIR-3190-5P | 131 | 0 |  |  | 0 |
| HSA-MIR-3652 | 132 | 0 |  |  | 0 |
| HSA-MIR-1292-5P | 133 | 0 |  |  | 0 |
| HSA-MIR-3917 | 134 | 0 |  |  | 0 |
| hsa-miR-4640-3P | 135 | 0 | mir-4640 | 0 | 0 |

**(3) Effect of modifying TF-target definition**

Supplementary Figure 3. A gene is defined as target of a TF if a TF binding site lies close to the gene’s transcription start site (TSS). The interval around the TSS to consider a valid TF-gene interaction is varied from ±250bp to ±4kb. Consequently the variation in the (a) total number of TF-gene interactions (or network edges), (b) TF out-degree distribution, and (c) mRNA in-degree distribution is shown.
